# Supplementary material for: Monitoring Acid–Base Titrations on Wax Printed Paper Microzones Using a Smartphone
Source: MDPI journal article supplement (doi:10.3390/mi8050139), 2017-05-02
Supplement: s1 [file s1]

# Supplementary Materials: Monitoring Acid–Base Titrations on Wax Printed Paper Microzones Using a Smartphone

Sandro A. Nogueira, Lucas R. Sousa, Nathália K. L. Silva, Pedro H. F. Rodrigues and Wendell K. T. Coltro

The calibration of the colorimetric response over a pH range was performed using standard solutions prepared according to the description listed in Table S1.

**Table S1.** Chemical composition of the solutions prepared\* at pH range between 1 and 12.

| pH | Solution A                                    |                       |             | Solution B  |                       |             |
|----|-----------------------------------------------|-----------------------|-------------|-------------|-----------------------|-------------|
|    | Composition                                   | Concentration (mol/L) | Volume (mL) | Composition | Concentration (mol/L) | Volume (mL) |
| 1  | KCl                                           | 0.2                   | 25          | HCl         | 0.2                   | 67          |
| 2  | KCl                                           | 0.2                   | 25          | HCl         | 0.2                   | 6,5         |
| 3  | KC <sub>8</sub> H <sub>5</sub> O <sub>4</sub> | 0.1                   | 50          | HCl         | 0.1                   | 22.3        |
| 4  | KC <sub>8</sub> H <sub>5</sub> O <sub>4</sub> | 0.1                   | 50          | HCl         | 0.1                   | 0.1         |
| 5  | KC <sub>8</sub> H <sub>5</sub> O <sub>4</sub> | 0.1                   | 50          | NaOH        | 0.1                   | 22.6        |
| 6  | KH <sub>2</sub> PO <sub>4</sub>               | 0.1                   | 50          | NaOH        | 0.1                   | 5.6         |
| 7  | KH <sub>2</sub> PO <sub>4</sub>               | 0.1                   | 50          | NaOH        | 0.1                   | 29.1        |
| 8  | KH <sub>2</sub> PO <sub>4</sub>               | 0.1                   | 50          | NaOH        | 0.1                   | 46.1        |
| 9  | Na <sub>2</sub> B <sub>4</sub> O <sub>7</sub> | 0.025                 | 50          | HCl         | 0.1                   | 4.6         |
| 10 | Na <sub>2</sub> B <sub>4</sub> O <sub>7</sub> | 0.025                 | 50          | NaOH        | 0.1                   | 18.3        |
| 11 | NaHCO <sub>3</sub>                            | 0.05                  | 50          | NaOH        | 0.1                   | 22.7        |
| 12 | K <sub>2</sub> HPO <sub>4</sub>               | 0.05                  | 50          | NaOH        | 0.1                   | 26.9        |

\*The final solution was prepared by mixing of the indicated volumes for reaching the desirable pH value. Final volume = 100 mL.
